# Supplementary material
Source: PubMed Central journal article supplement (PMC3634600)

**SUPPORTING INFORMATION**

**DOI:** 10.1002/ejic.201101362

**Title:** Synthesis, Characterization, and in vitro Testing of a Bacteria-Targeted MR Contrast Agent

**Author(s):** Lauren M. Matosziuk, Allison S. Harney, Keith W. MacRenaris, Thomas J. Meade\*

$^1\text{H}$  and  $^{13}\text{C}$  NMR of **4-10**: S2-S8

MS (ESI-positive) of **8-10**: S9-S10

Analytical HPLC and HPLC-MS of Zn-**1** compounds: S11-S13

Luminescence Decay of Zn-**1**-Tb in  $\text{H}_2\text{O}$  and  $\text{D}_2\text{O}$ : S14

Relaxivity of Zn-**1**: S14-S15

$^1\text{H}$  NMR of Zn-**1**-Eu: S15-S16

$T_2$  imaging data: S16

**Figure S2: <sup>1</sup>H NMR of 4**

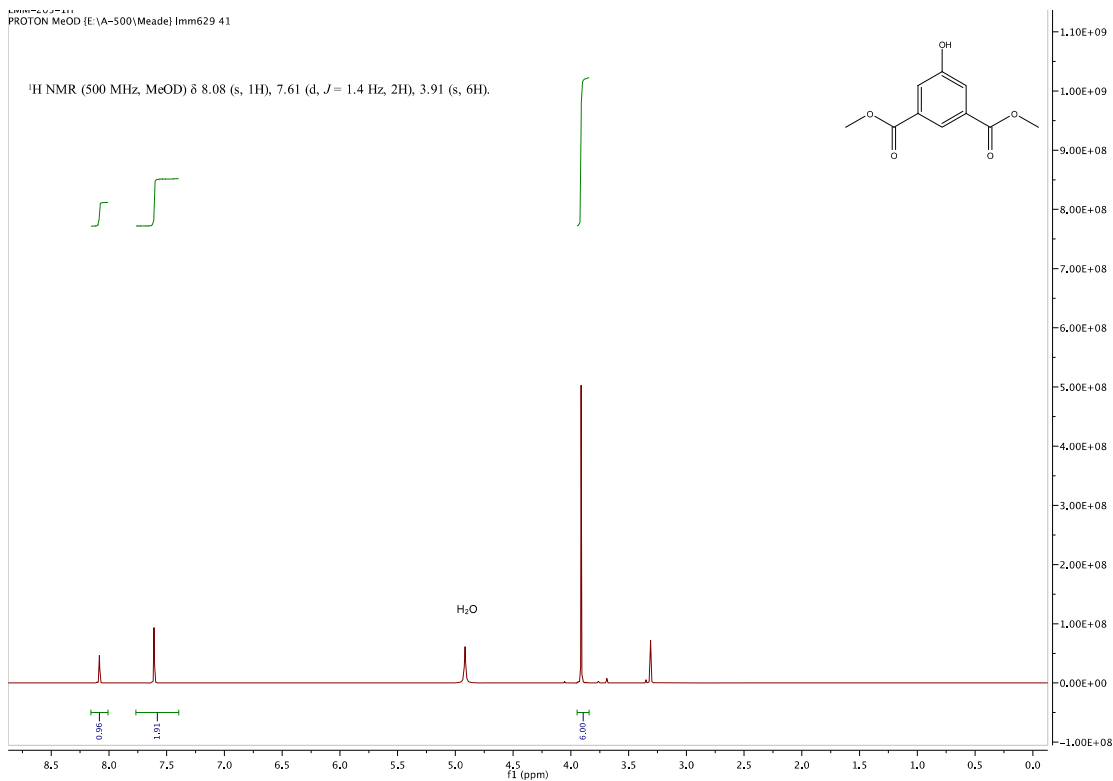

**Figure S1: <sup>13</sup>C NMR of 4**

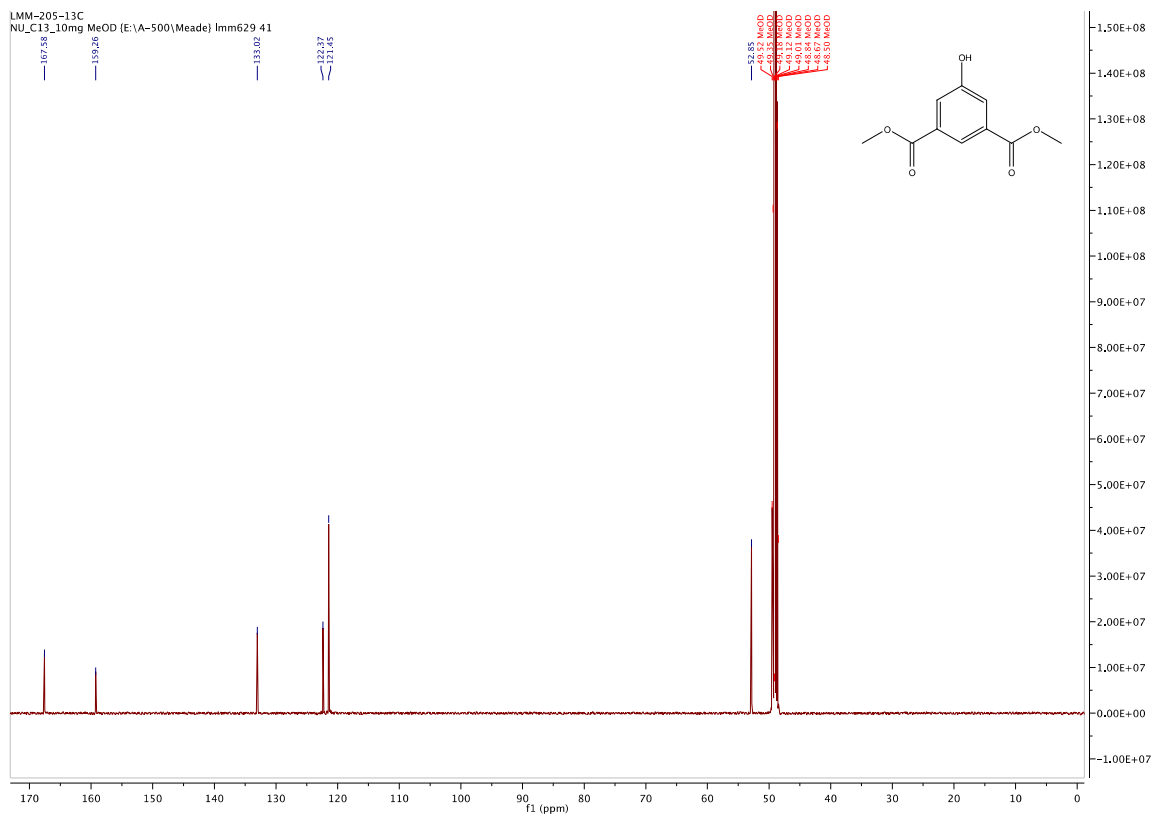

**Figure S3: <sup>1</sup>H NMR of 5**

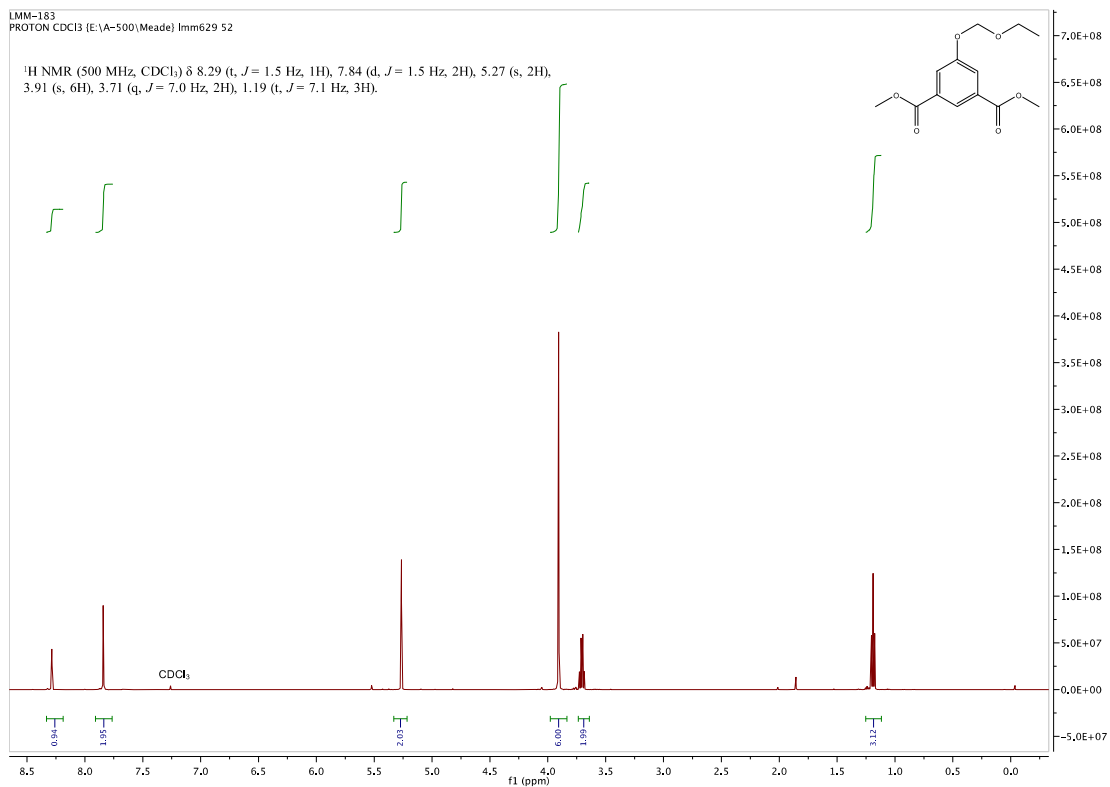

**Figure S4: <sup>13</sup>C NMR of 5**

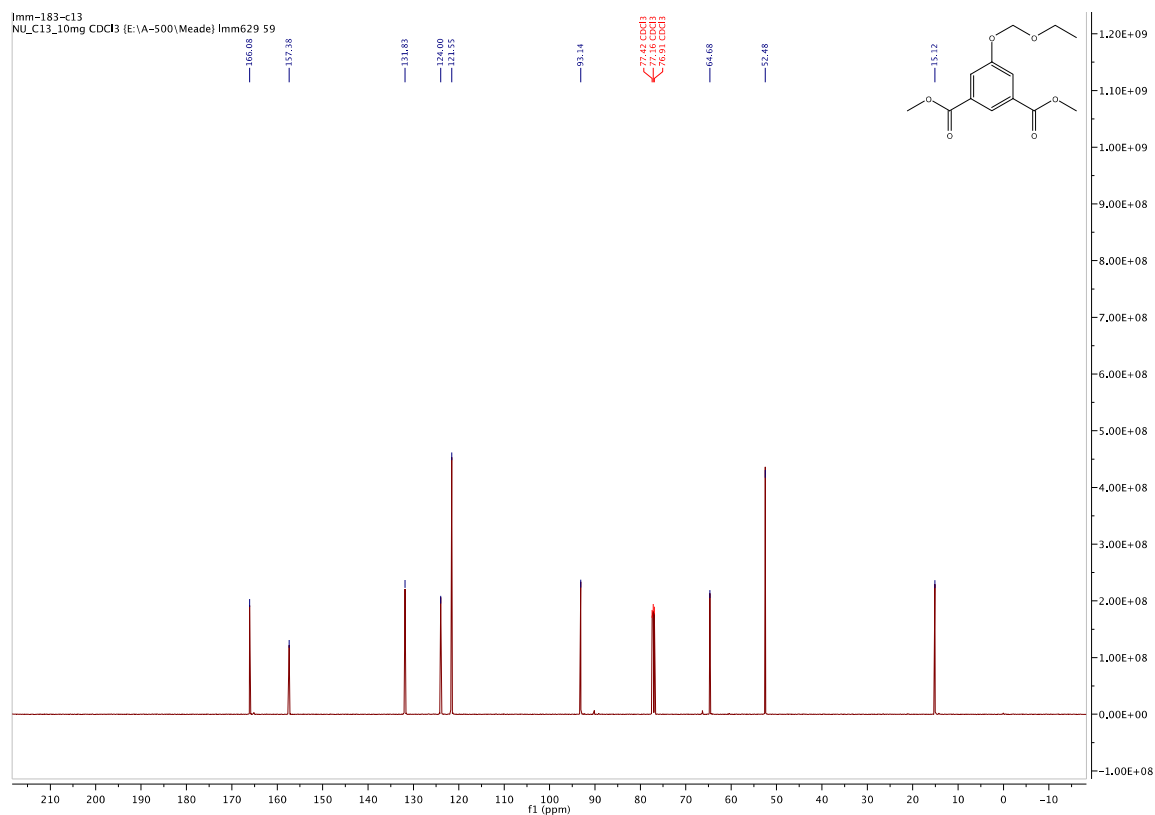

**Figure S5: <sup>1</sup>H NMR of 6**

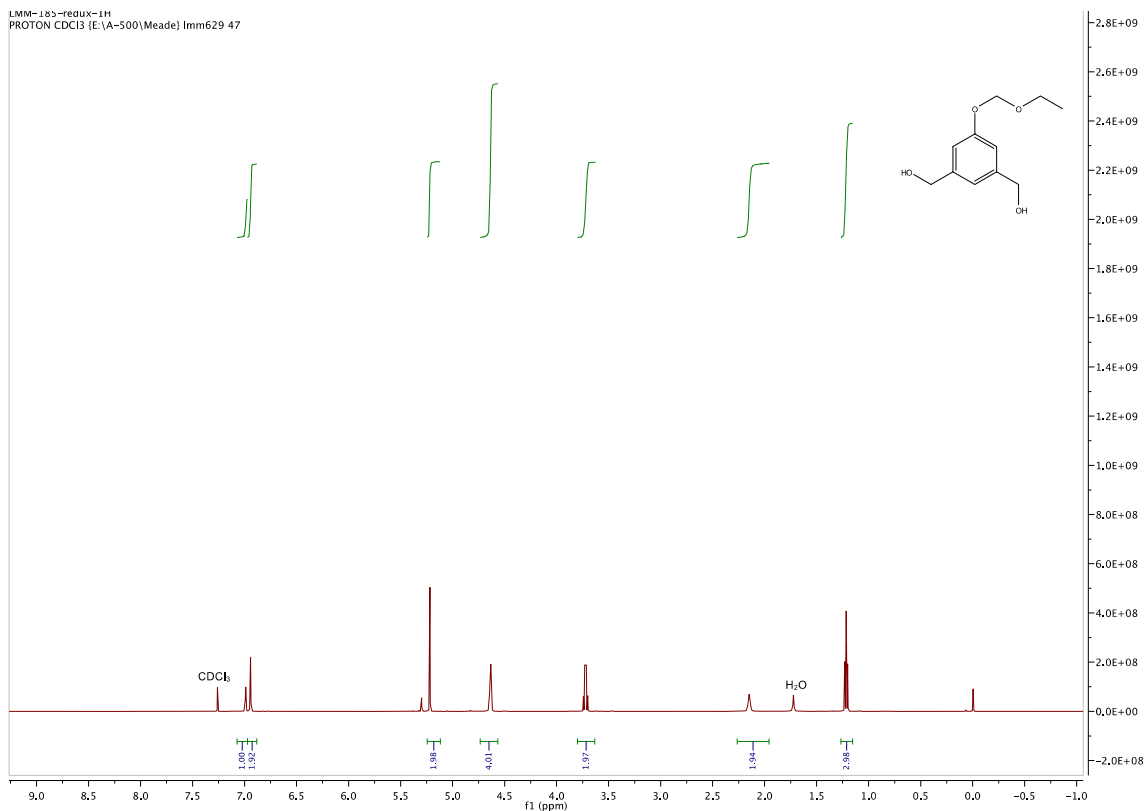

**Figure S6: <sup>13</sup>C of 6**

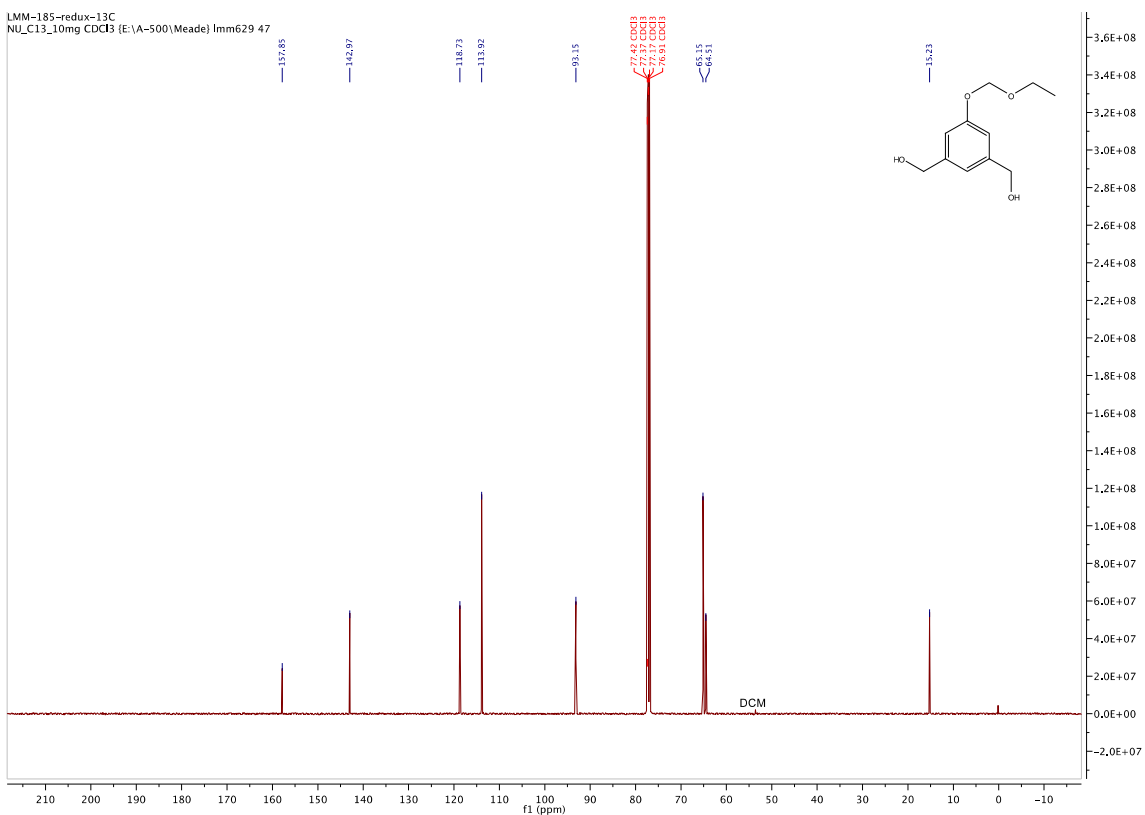

**Figure S7: <sup>1</sup>H NMR of 7**

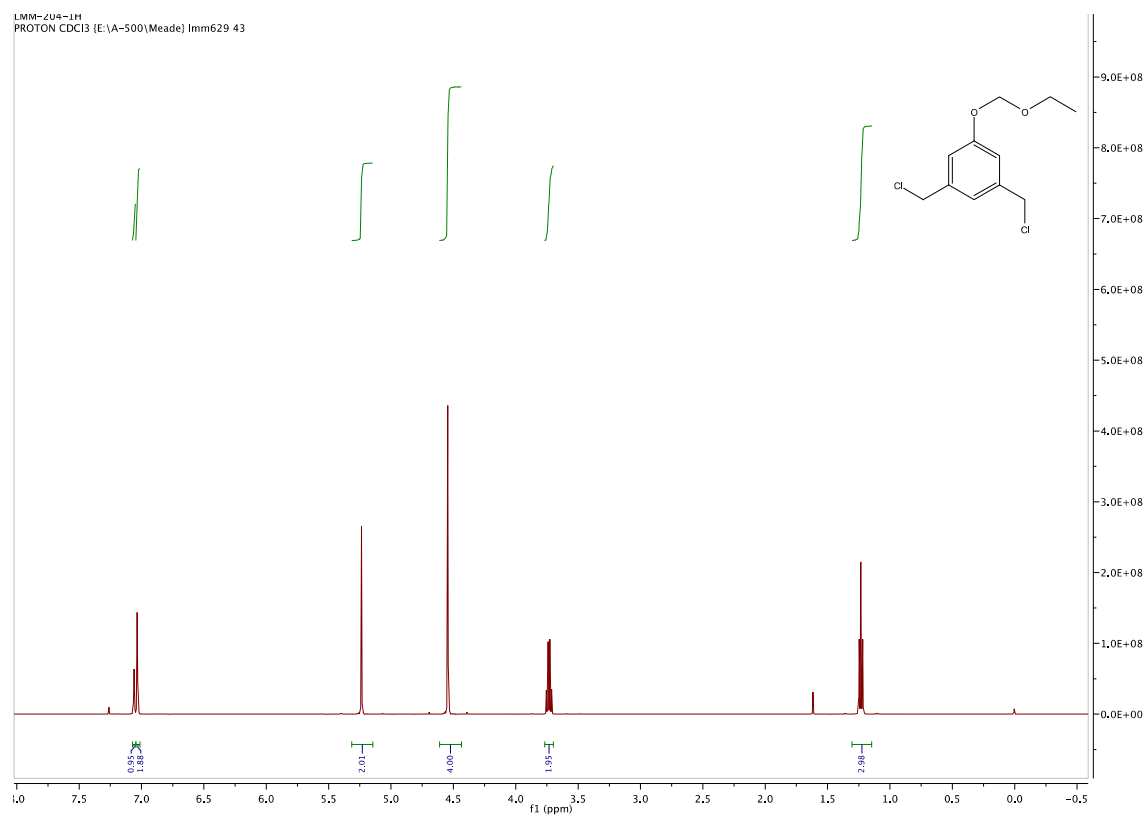

**Figure S8: <sup>13</sup>C NMR of 7**

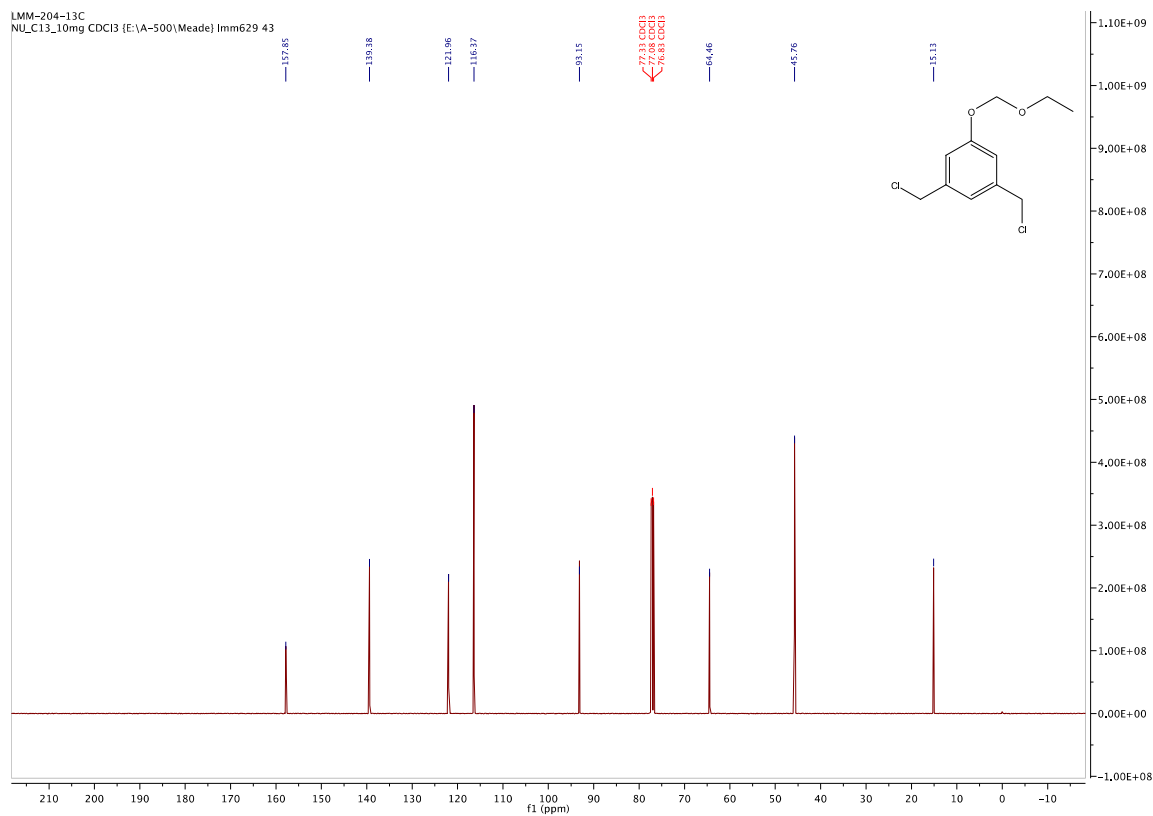

**Figure S9: <sup>1</sup>H NMR of 8**

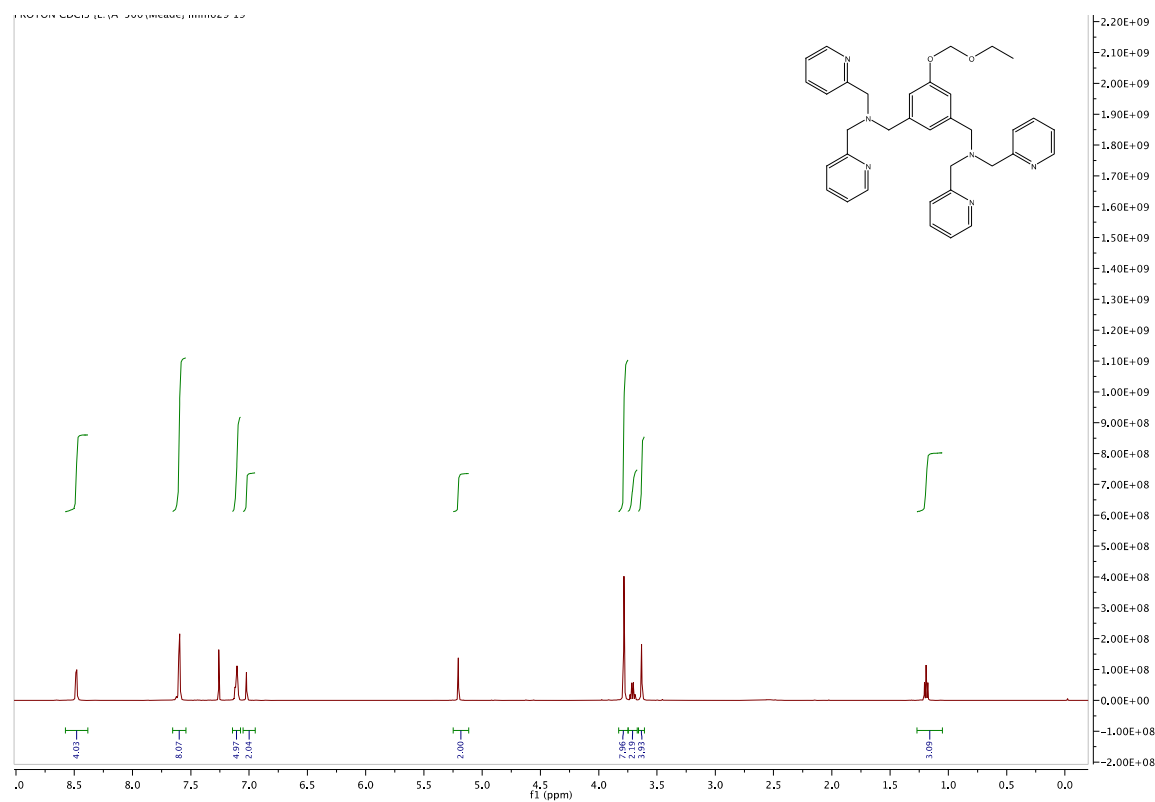

**Figure S10: <sup>13</sup>C NMR of 8**

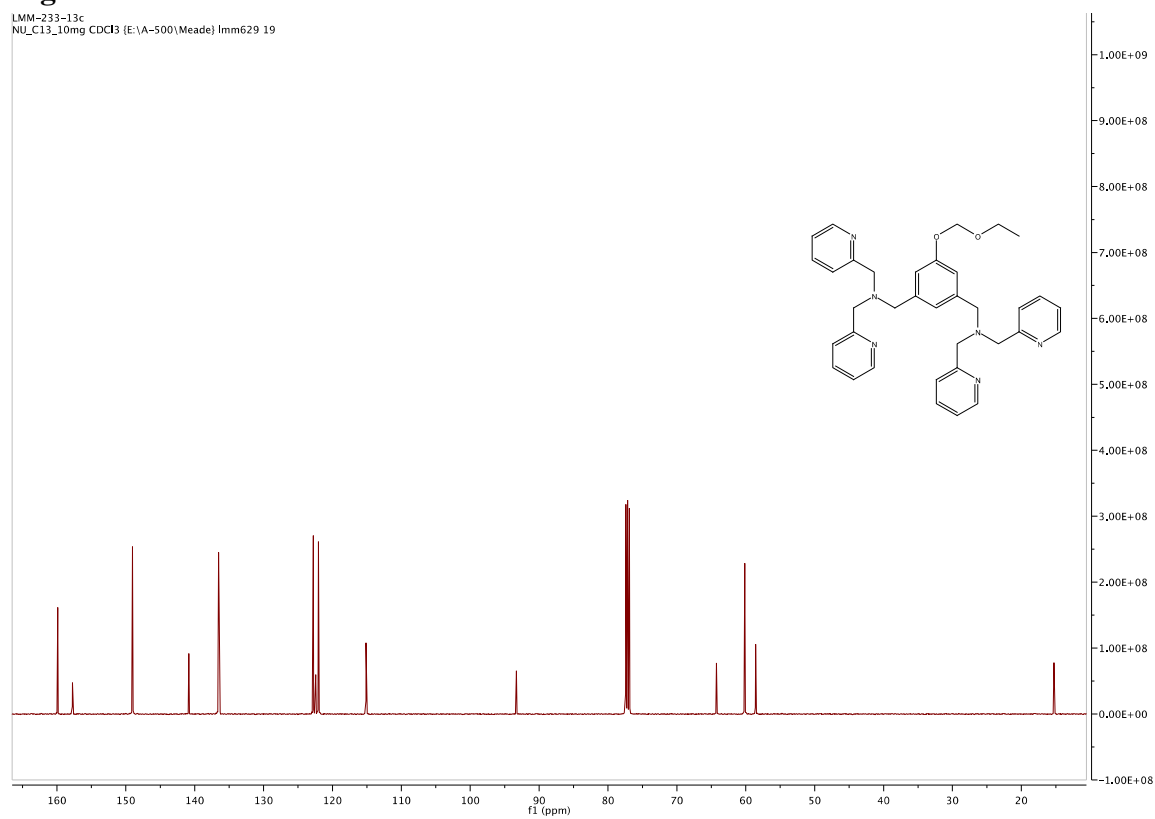

**Figure S11: <sup>1</sup>H NMR of 9**

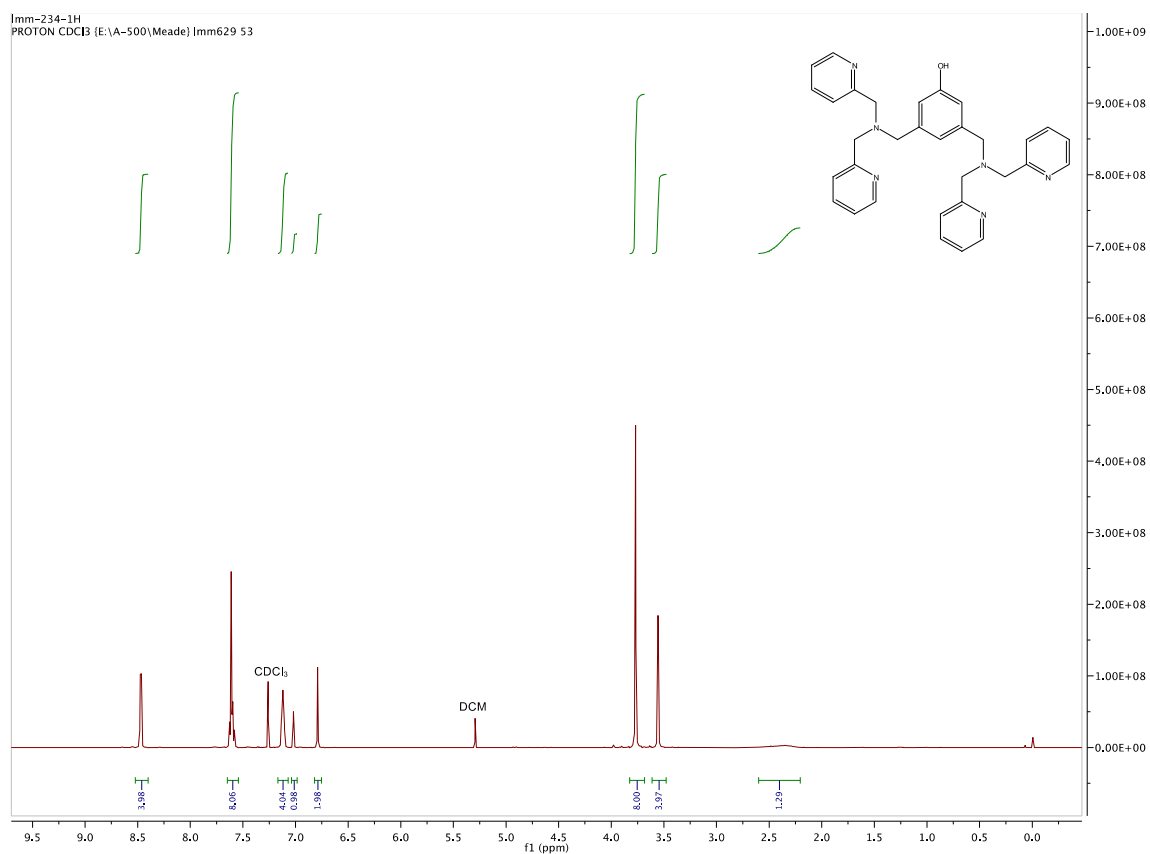

**Figure S12: <sup>13</sup>C NMR of 9**

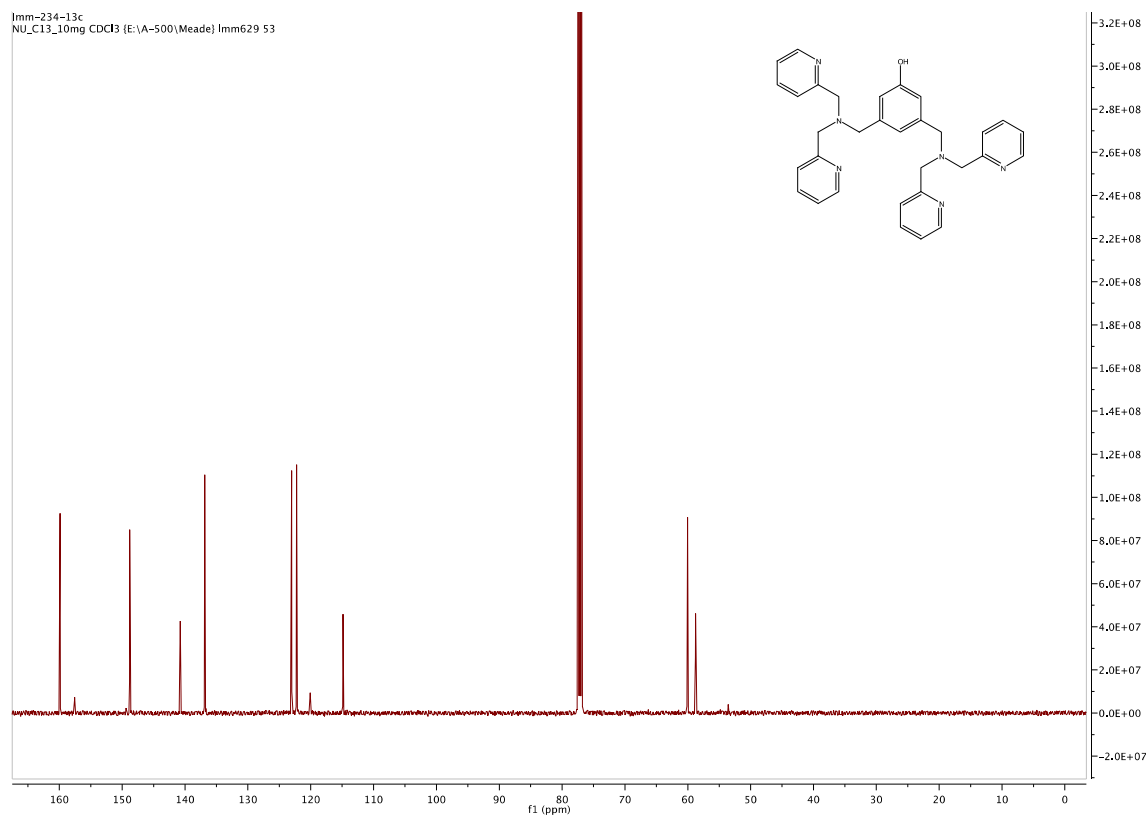



**Figure S13: <sup>1</sup>H NMR of 10**

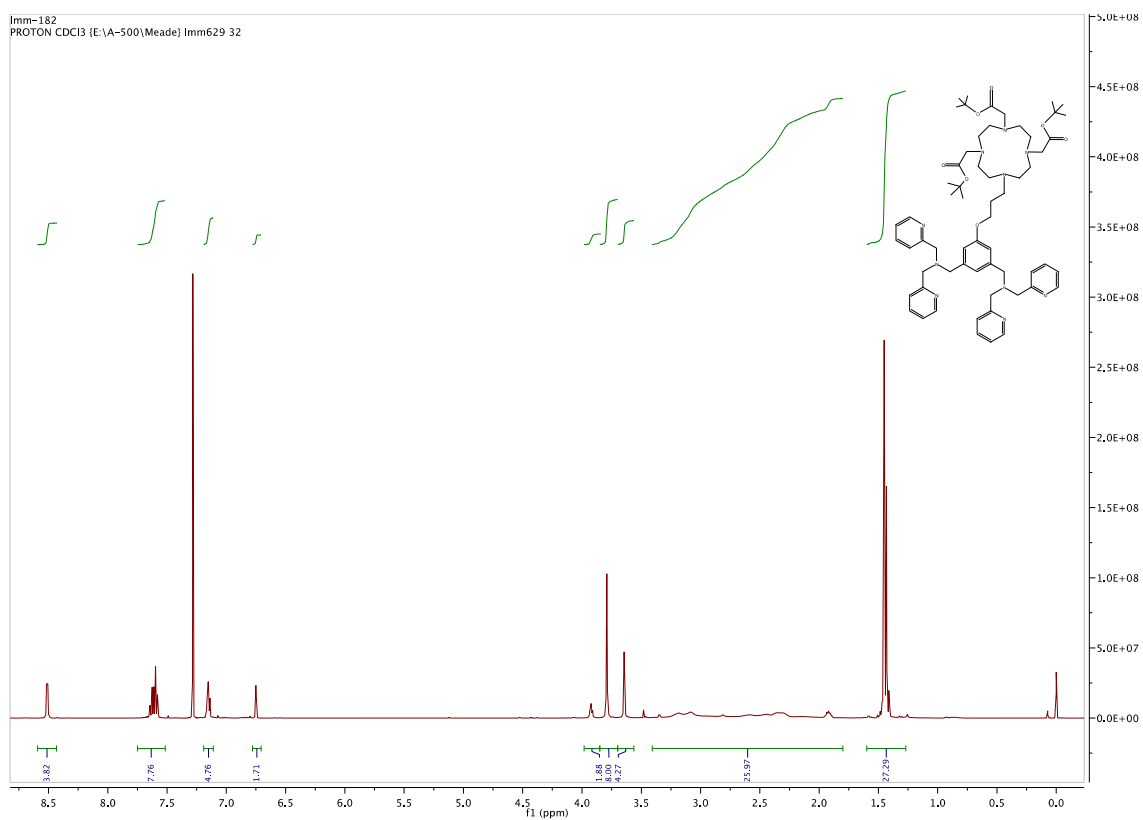

**Figure S14: <sup>13</sup>C NMR of 10**

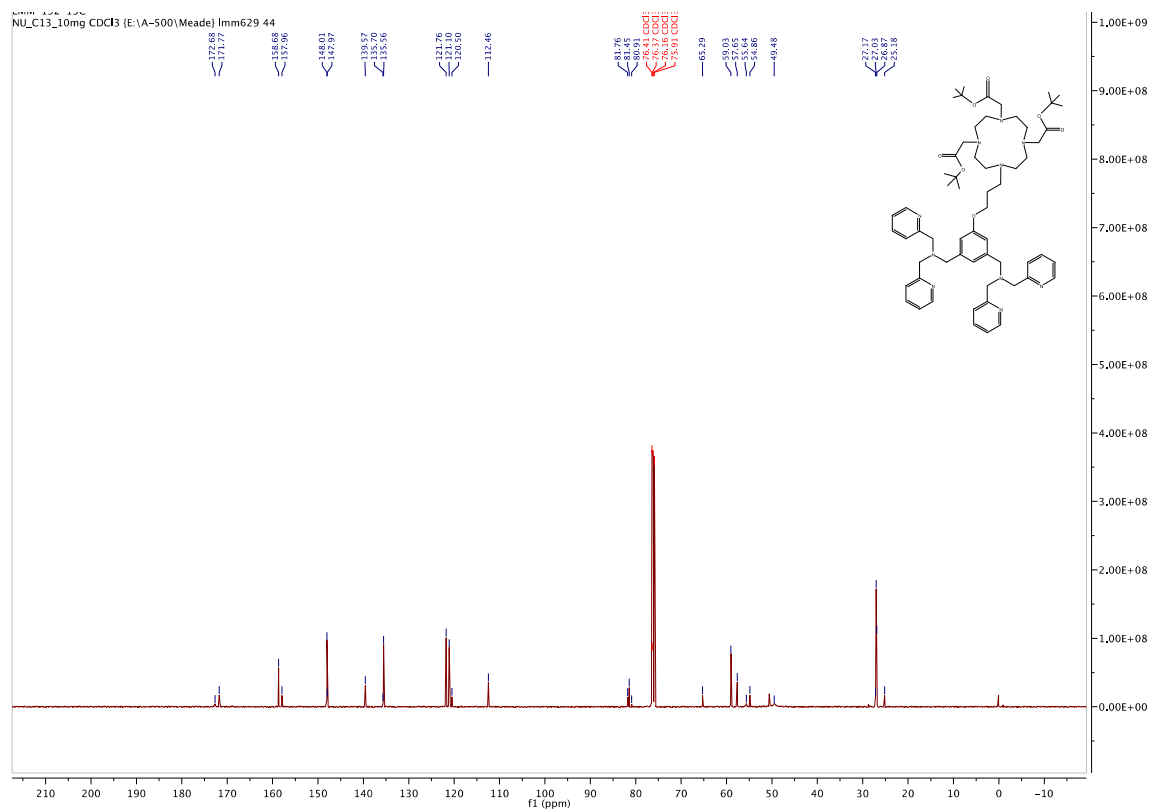

**Figure S15: MS (ESI-positive) of 8**

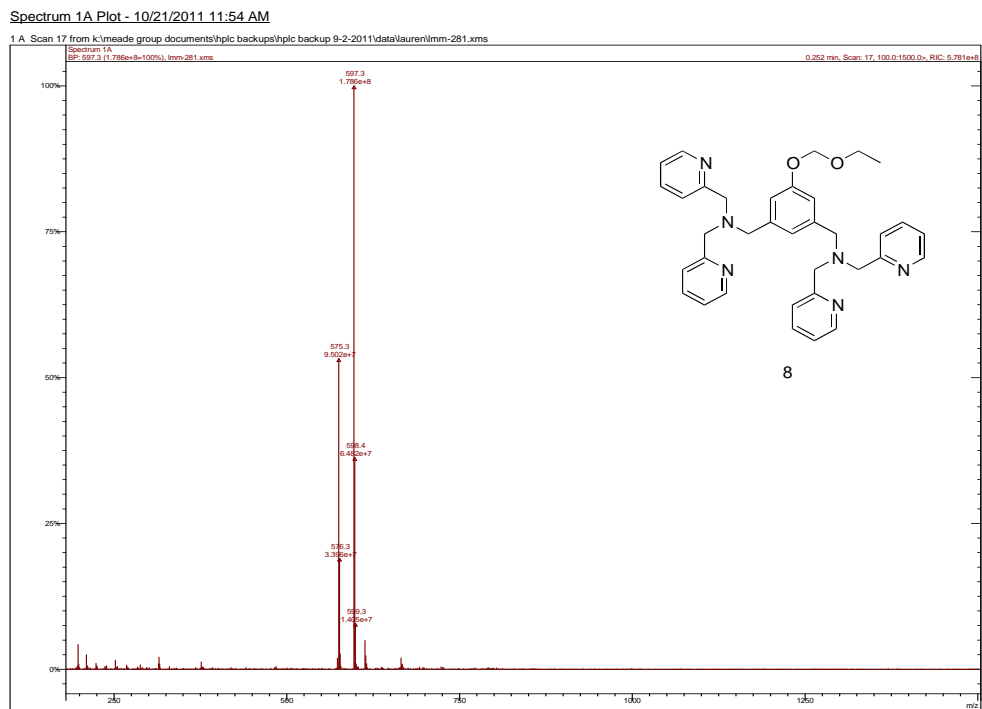

**Figure S16: MS (ESI-positive) of 9**

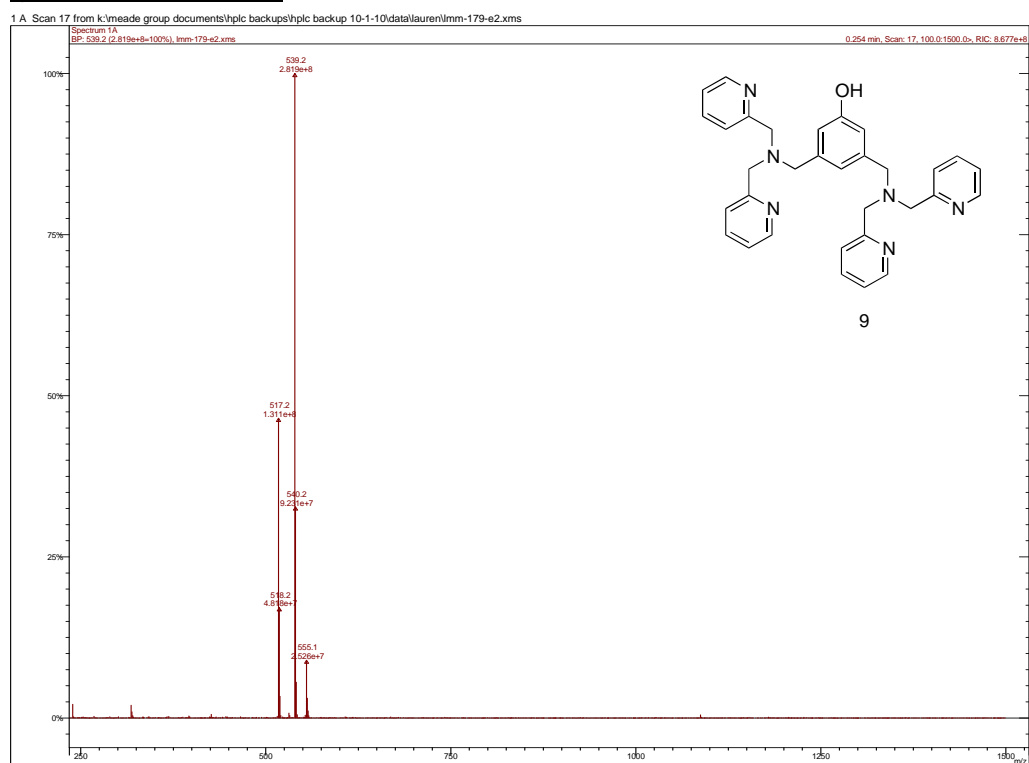

Figure S17: MS (ESI-positive) of **10**

Spectrum 1A Plot - 10/25/2011 3:59 PM

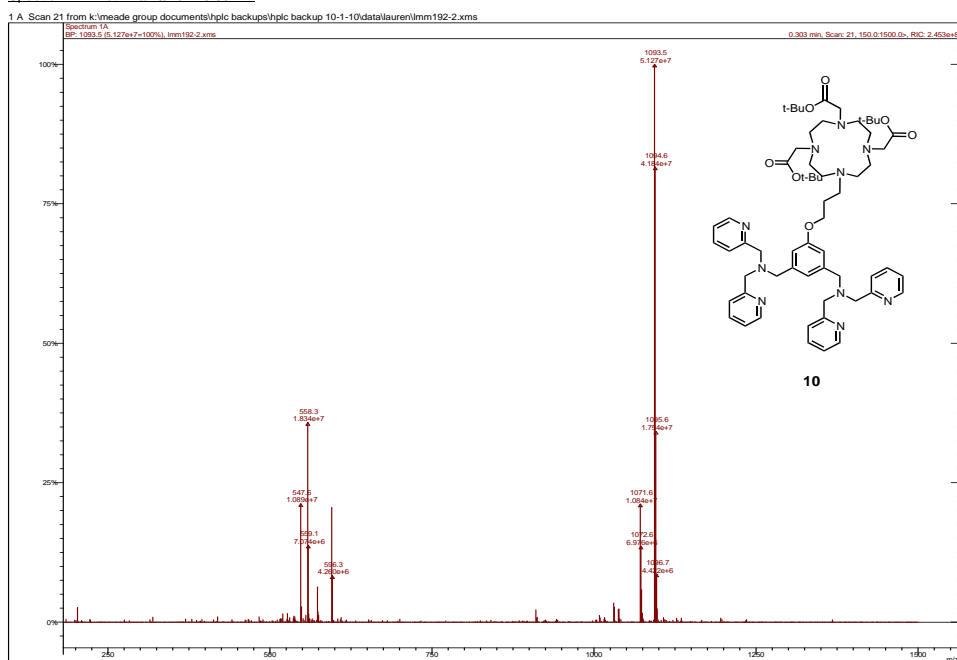

Figure S18: MS (ESI-positive) of **10** after deprotection with TFA

Spectrum 1A Plot - 10/21/2011 12:20 PM

1 A Scan 17 from k:\meade group documents\hplc backups\hplc backup 5-27-2011\data\lauren\deprotected-ig.xms

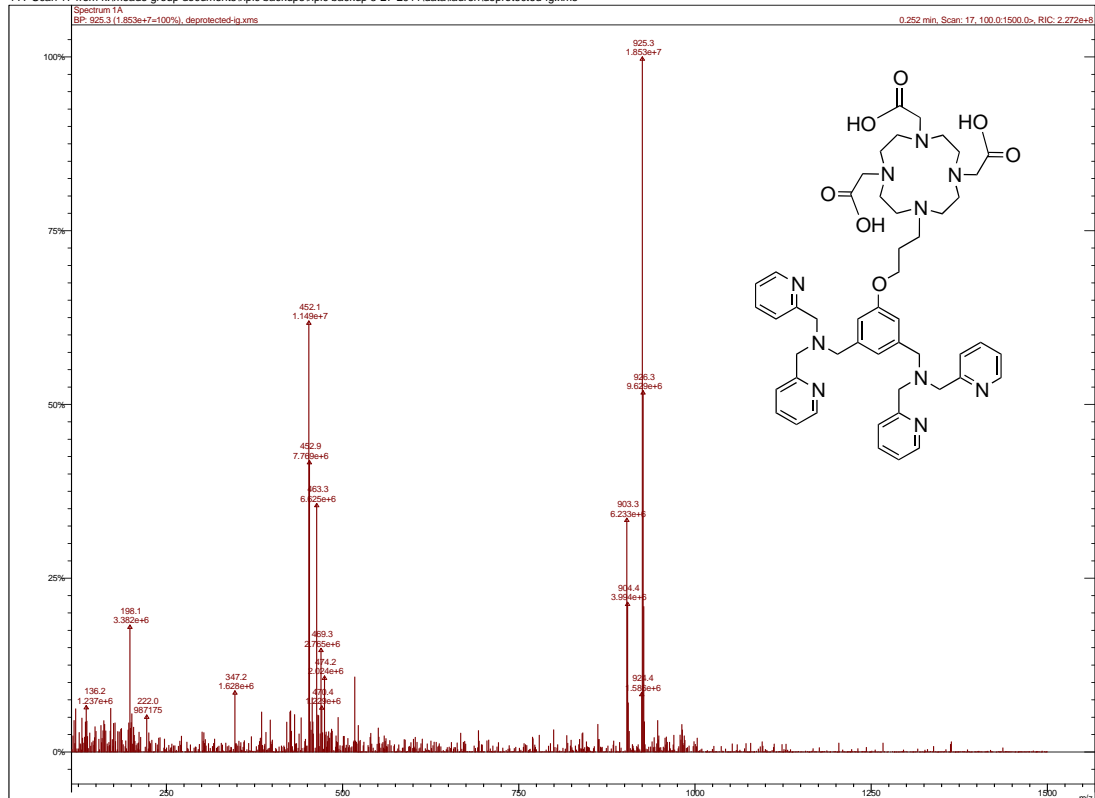

**Figure S19:** Analytical HPLC trace (ELSD) of Zn-1-Eu

Chromatogram Plot 1 - 10/21/2011 7:14 PM

File: c:\varianw\data\lauren\no seriously retard\_10-21-2011\_5-53-51 pm.run  
Sample: Operator:  
Scan Range: 0 - 0 Time Range: 0.00 - 49.98 min. Date: 10/21/2011 5:53 PM

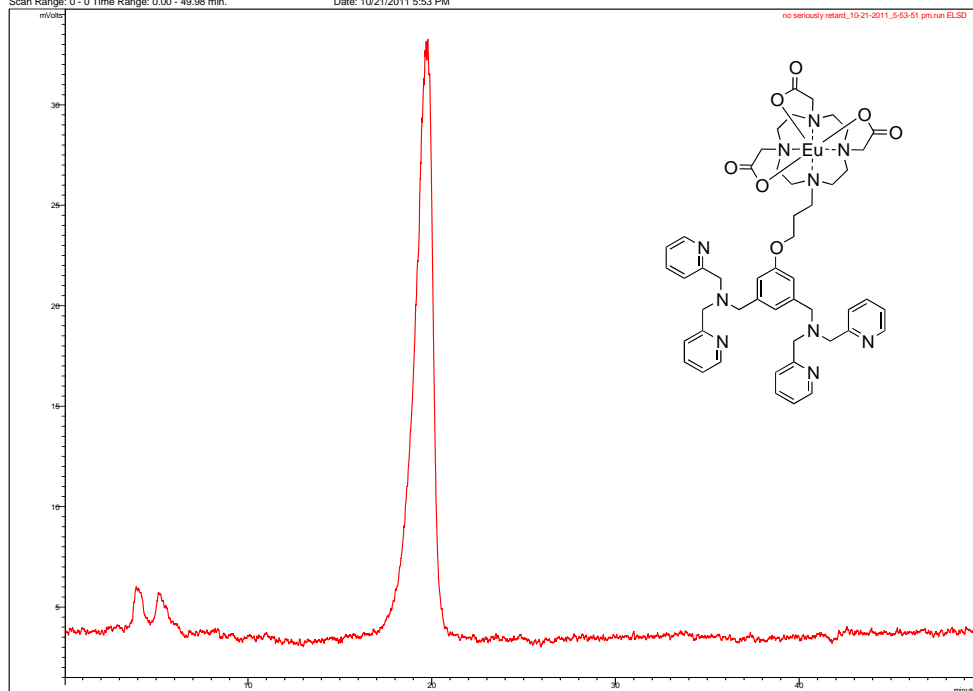

**Figure S20:** HPLC-MS (ESI-positive) of Zn-1-Eu

Spectrum 1A Plot - 10/21/2011 7:18 PM

1 A Scan 1294 from c:\varianw\data\lauren\eu-iguana.xms

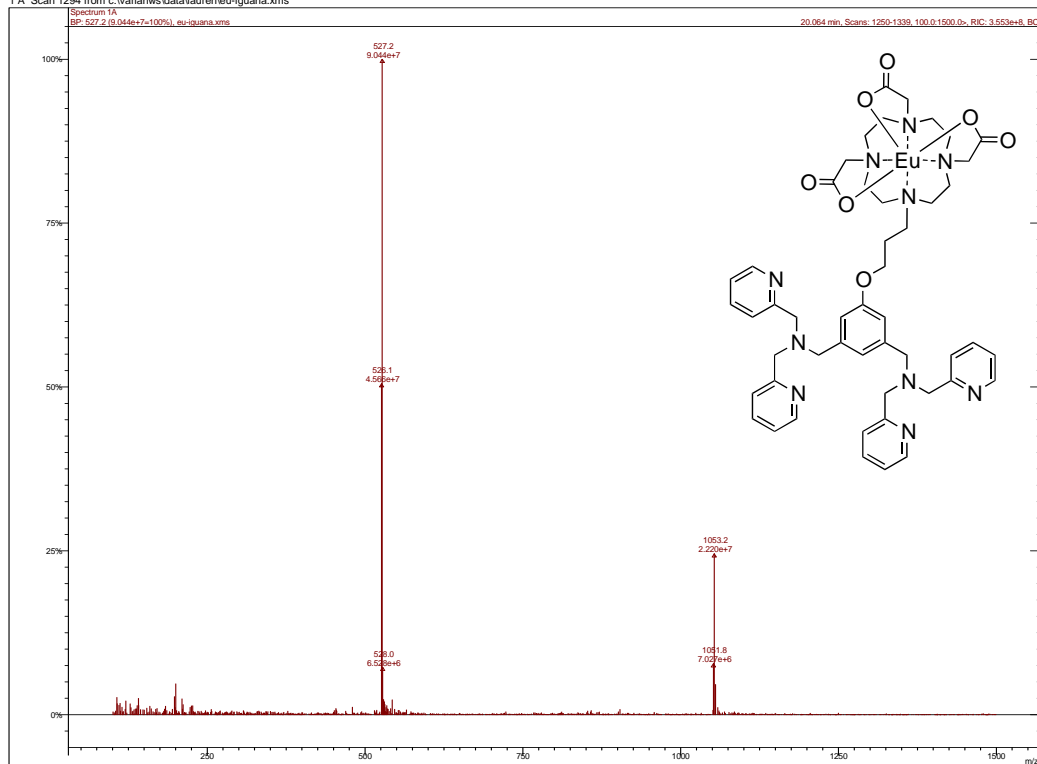

**Figure S21:** Analytical HPLC trace (ELSD) of Zn-1

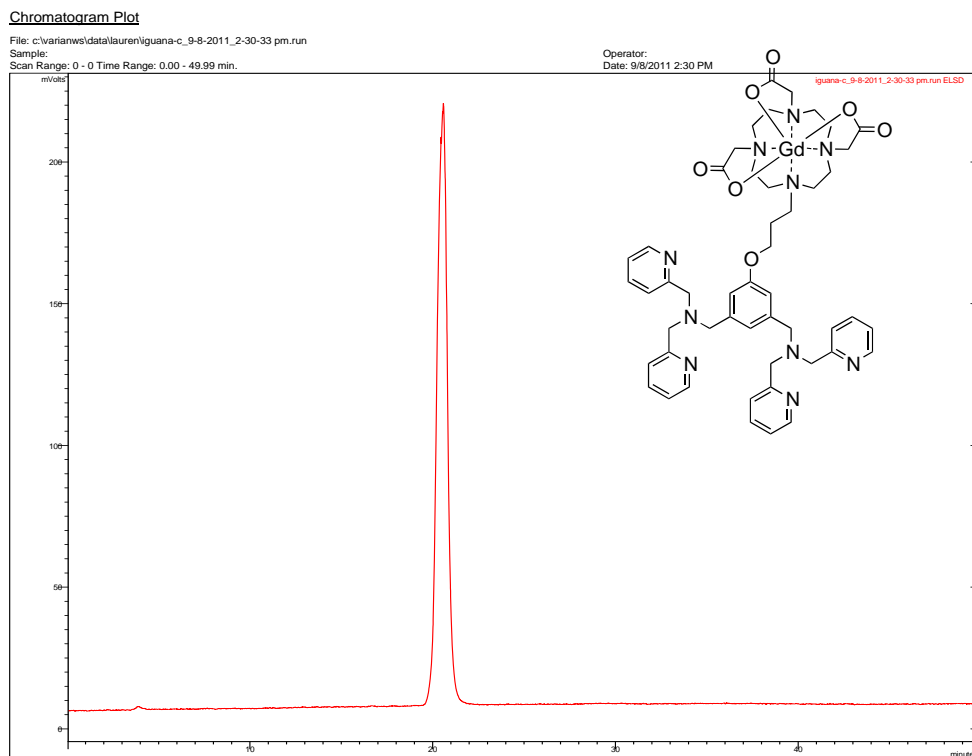

**Figure S22:** HPLC MS of Zn-1

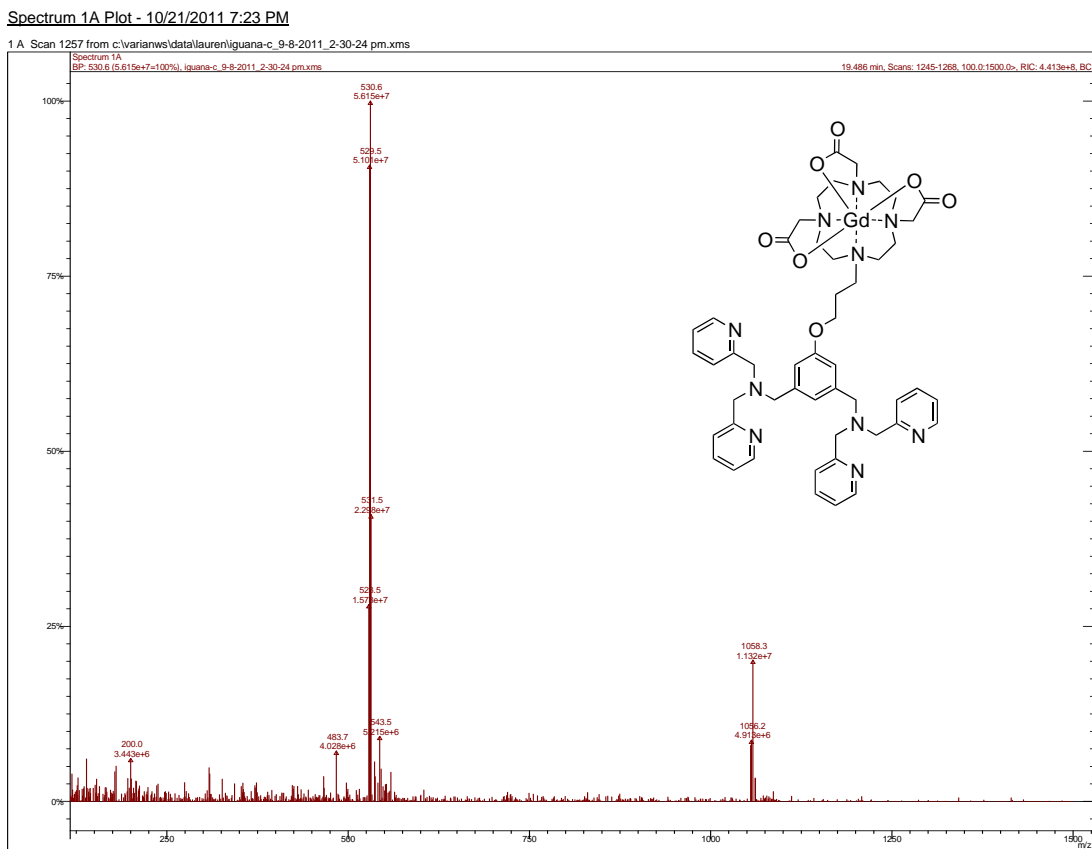

**Figure S23: Analytical HPLC trace (ELSD) of Zn-1-Tb**

Chromatogram Plot 1 - 10/25/2011 3:53 PM

File: k:\meade group documents\hplc backups\hplc backup 5-27-2011\data\lauren\hplc-imm-186\tb-iguana-with elsd\_12-8-2010\_5-06-10 pm.run

Sample:

Operator:

Scan Range: 0 - 0 Time Range: 0.00 - 49.99 min.

Date: 12/8/2010 5:06 PM

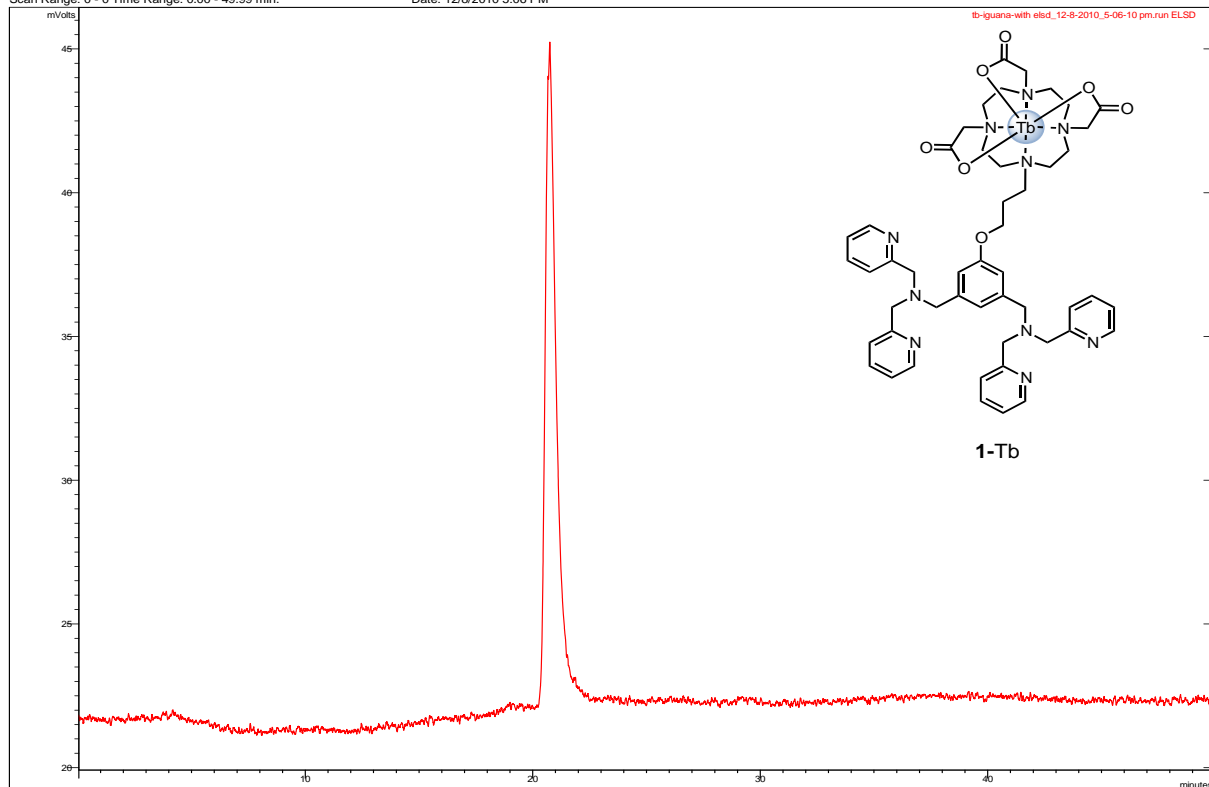

**Figure S24: HPLC-MS (ESI positive) of Zn-1-Tb**

Spectrum 1A Plot - 10/25/2011 3:50 PM

1 A Scan 1371 from ... \hplc backups\hplc backup 5-27-2011\data\lauren\hplc-imm-186\tb-iguana-with elsd\_12-8-2010\_5-06-00 pm.xms

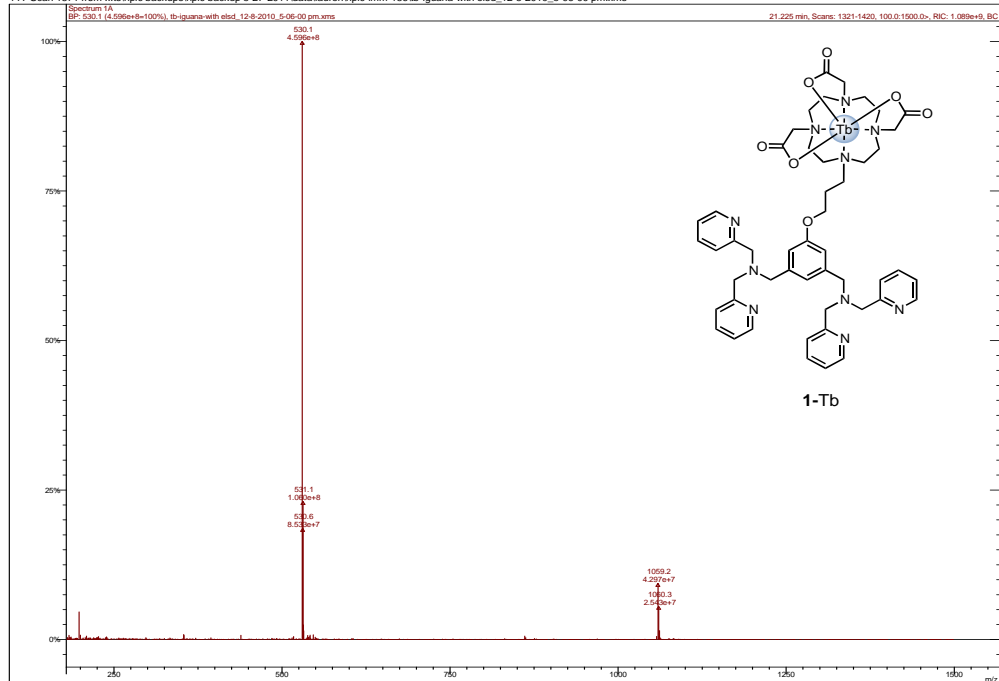

**Figure S24:** Luminescence lifetime measurements of Zn-1-Tb in H<sub>2</sub>O and D<sub>2</sub>O

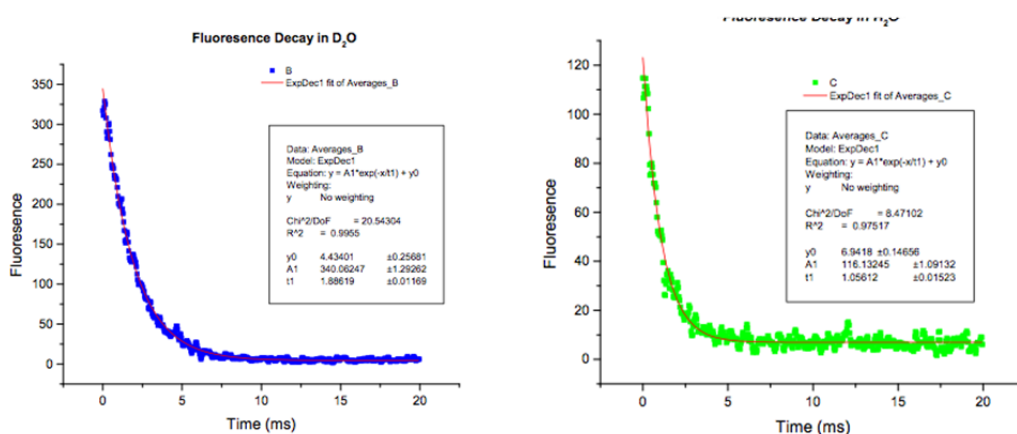

**Figure S25:** Relaxivity of Zn-1 in 2% DMSO in LB Media at 1.4 T (37 °C)

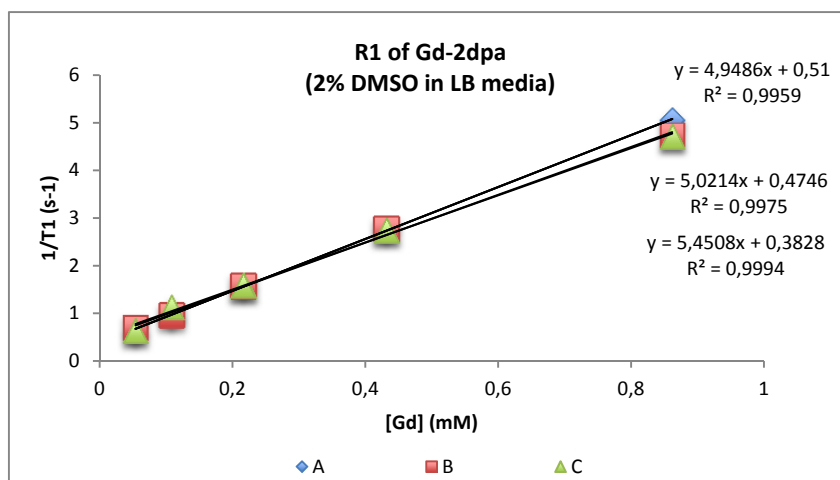

**Figure S26:** Relaxivity of Zn-1 in agarose gel at 1.4 T (37 °C)

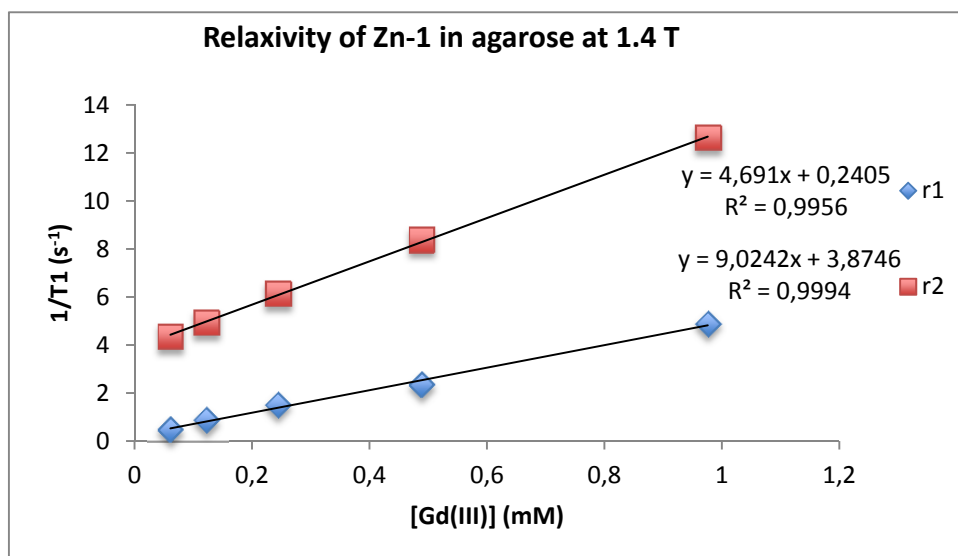

**Figure S27:** Relaxivity of Zn-1 in agarose gel at 7T (25 °C)

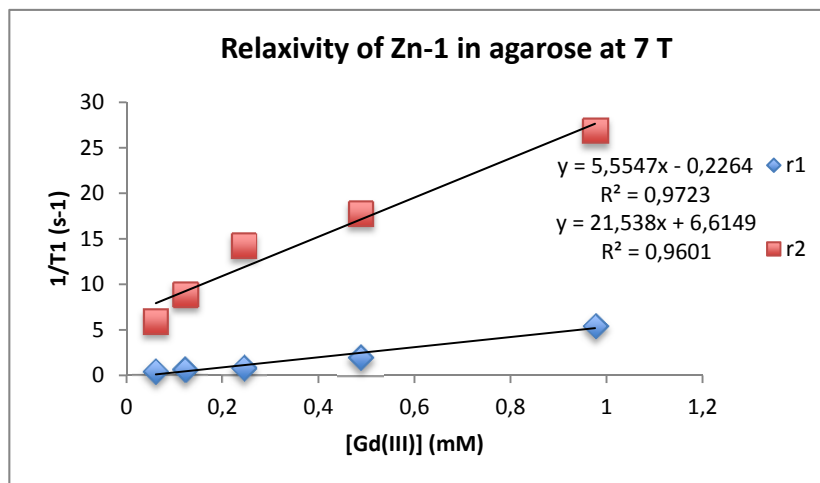

**Figure S28:** Full  $^1\text{H}$  spectrum of Zn-1-Eu at 60 °C in  $d_6$ -DMSO at 600 MHz.

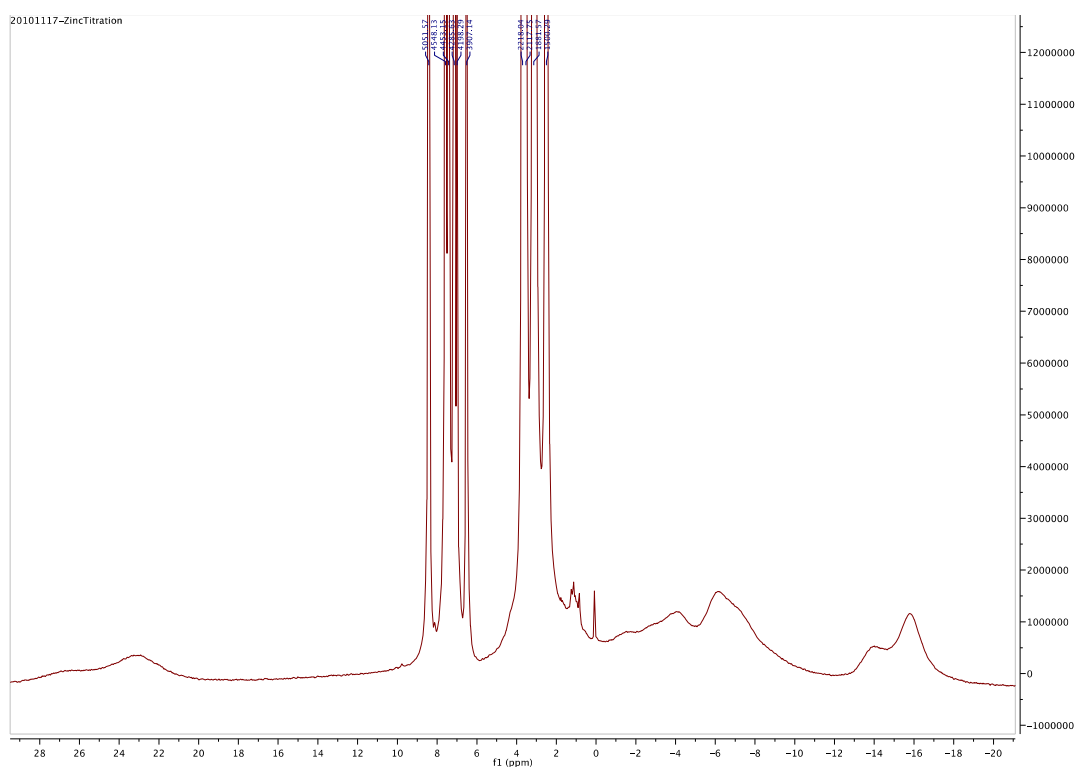



**Figure S29:** Close up of  $^1\text{H}$  NMR of **1-Eu** with increasing equivalents of Zn.

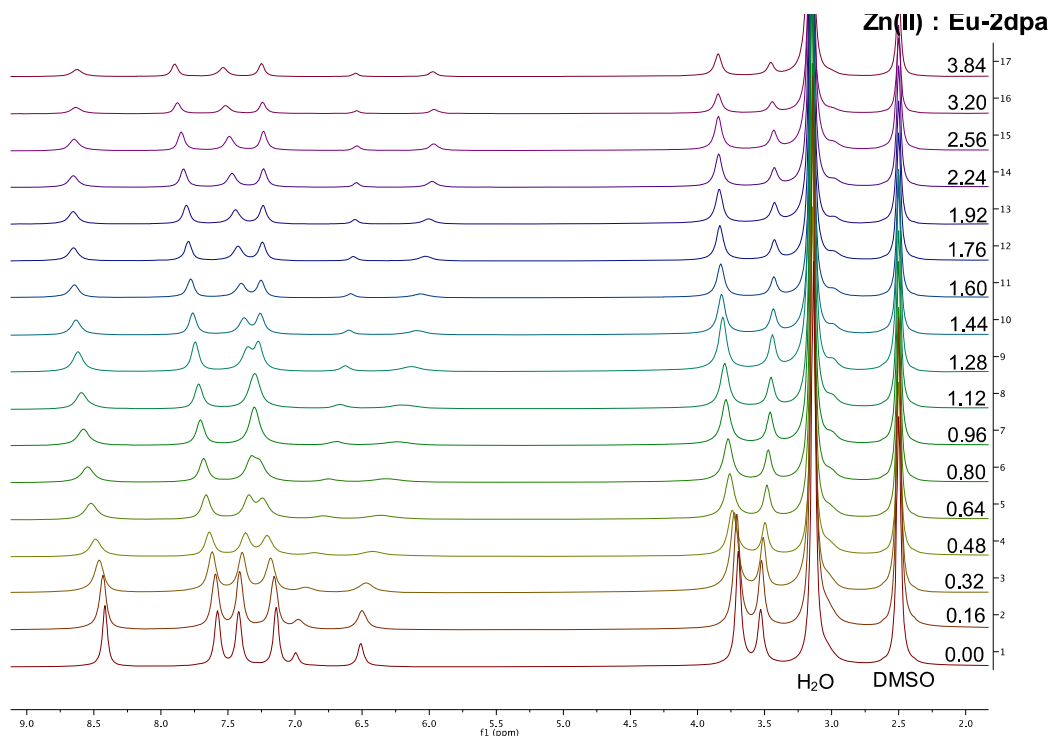

**Figure S30:** Top -  $T_2$ -weighted phantom images of *S. Aureus* incubated with Zn-1, Zn-2, and Zn3. Images were acquired at 7T at 25 °C. Bottom:  $T_2$  map of phantoms.

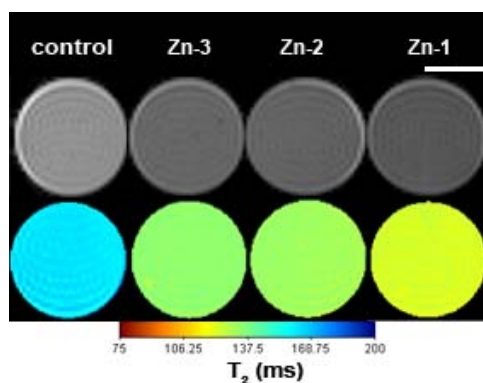

**Figure S31:**  $T_2$  relaxation times:  $T_2$  relaxation times were acquired at 1.41 (37 °C) and 7 T (25 °C). Data are presented as the percent reduction in  $T_2$  versus bacteria incubated with LB media, washed, and suspended in agarose.

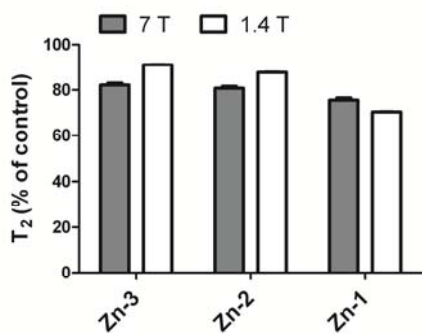

**Figure S32:**  $T_1$  weighted phantom images of *S. Aureus* incubated with Zn-1, Zn-2, and Zn-3. Images were acquired at 7T (25 °C).

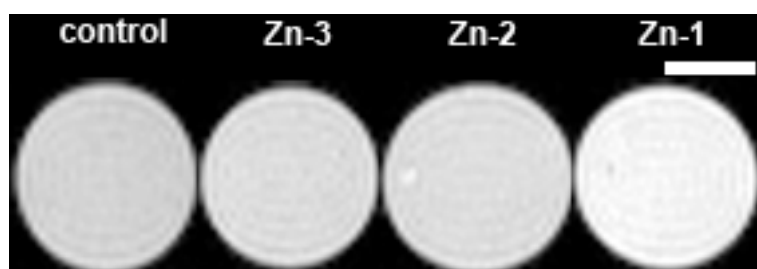

Supplement: NIHMS455778-supplement-Suppl_Information.pdf [file NIHMS455778-supplement-Suppl_Information.pdf]
